# Supplementary material for: 49.25% efficient cyan emissive sulfur dots via a microwave-assisted route
Source: Royal Society of Chemistry journal article supplement (doi:10.1039/d0ra02778b), 2020-01-01
Supplement: d0ra02778b1.pdf [file d0ra02778b1.pdf]

Supporting Information

## **49.25% efficient cyan emissive sulfur dots via microwave-assisted route**

Zhe Hu,<sup>a</sup> Hanqing Dai,<sup>b</sup> Xian Wei,<sup>a</sup> Danlu Su,<sup>a</sup> Chang Wei,<sup>a</sup> Yuanyuan Chen,<sup>a</sup> Fengxian Xie,<sup>a</sup> Wanlu Zhang,<sup>a</sup> Ruiqian Guo,<sup>a, b, \*</sup> and Songnan Qu<sup>c, \*</sup>

<sup>a</sup> Engineering Research Center of Advanced Lighting Technology, Ministry of Education; Institute for Electric Light Sources, Fudan University, Shanghai 200433, China

<sup>b</sup> Institute of Future Lighting, Academy for Engineering and Technology, Fudan University, Shanghai 200433, China

<sup>c</sup> Joint Key Laboratory of the Ministry of Education, Institute of Applied Physics and Materials Engineering, University of Macau, Avenida da Universidade, Taipa, Macau 999078, P. R. China

\* Corresponding author.

E-mail address: [rqguo@fudan.edu.cn](mailto:rqguo@fudan.edu.cn), [qusn@ciomp.ac.cn](mailto:qusn@ciomp.ac.cn)

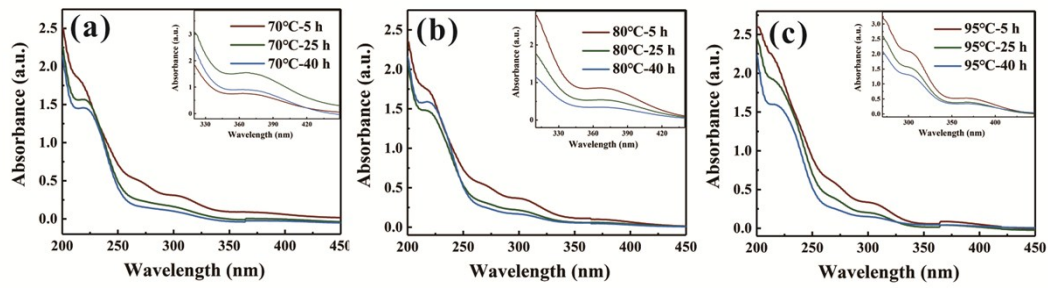

Figure.S1 PL spectra of the SDs synthesized at different heating time under different nucleation temperatures of (a) 70°C, (b) 80°C, and (c) 95°C.

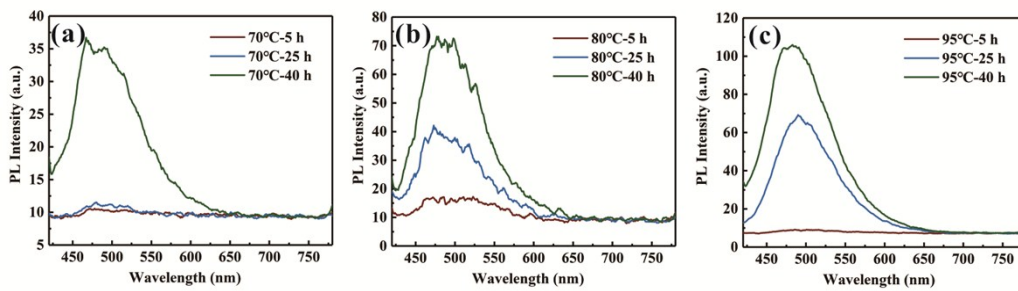

Figure.S2 UV-vis absorption spectra of the SDs diluted 1000 times and 10000 times (inset) at different heating time under different nucleation temperatures of (a) 70°C, (b) 80°C, and (c) 95°C.

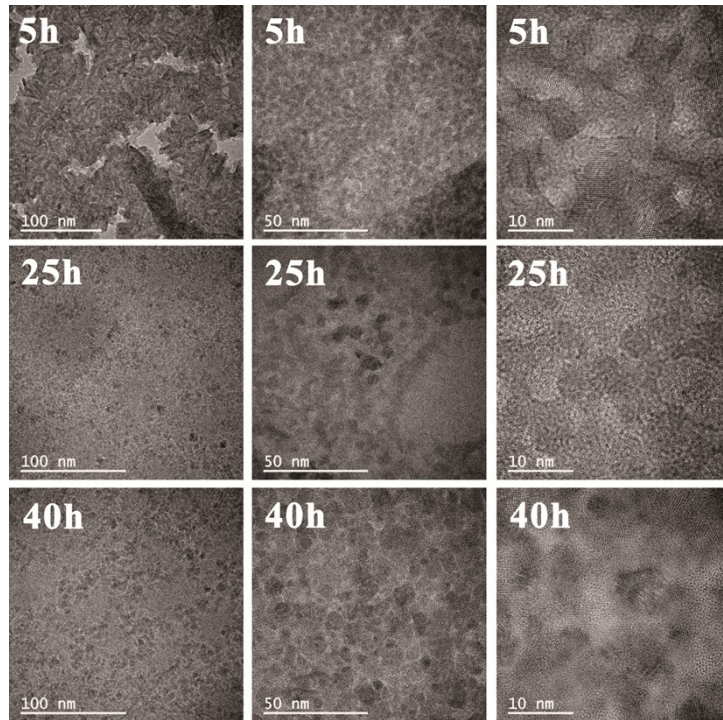

Figure.S3 TEM images of the SDs synthesized under 90°C at different heating time.

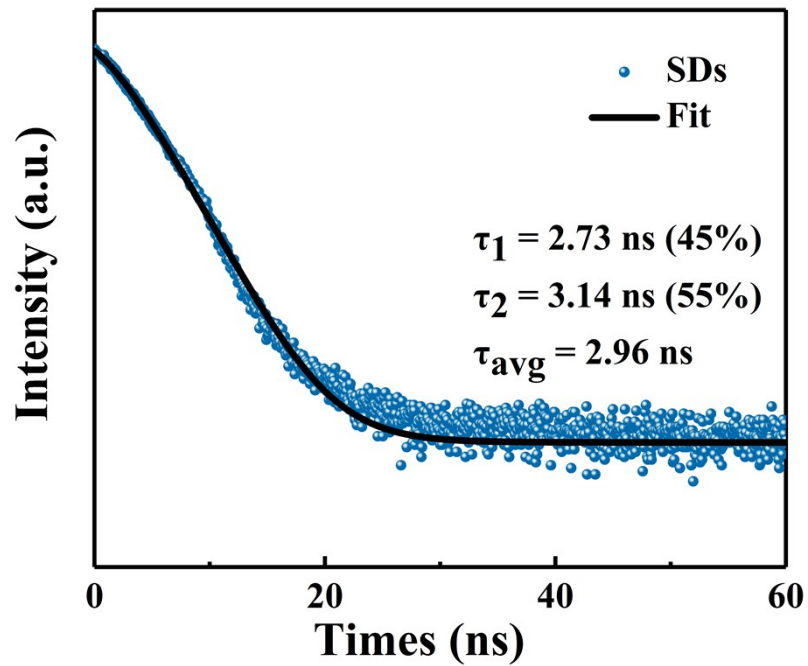

Figure.S4 PL decay curve of the SDs under 90°C for 40 h treated with 3 wt% H<sub>2</sub>O<sub>2</sub> solution.

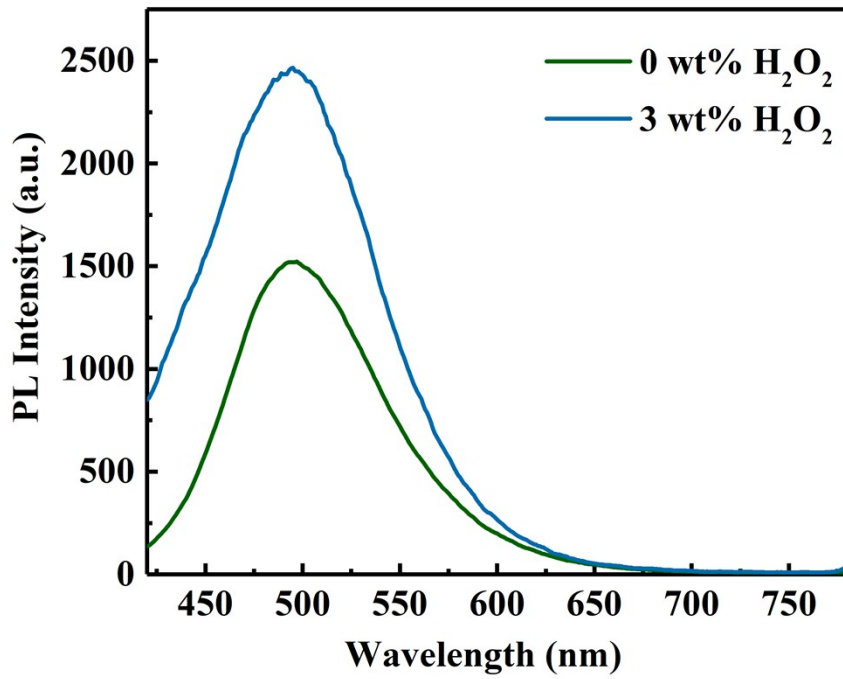

Figur

e.S5 PL spectra of the SDs synthesized under 90°C for 40 h treated with 0 and 3 wt% H<sub>2</sub>O<sub>2</sub> solution.
